# Supplementary material for: Genetic Variability of Human Cytomegalovirus Clinical Isolates Correlates With Altered Expression of Natural Killer Cell-Activating Ligands and IFN-γ
Source: PubMed Central journal article supplement (PMC8062705; doi:10.3389/fimmu.2021.532484), 2021-04-09
Supplement: Image_3.pdf [file Image_3.pdf]

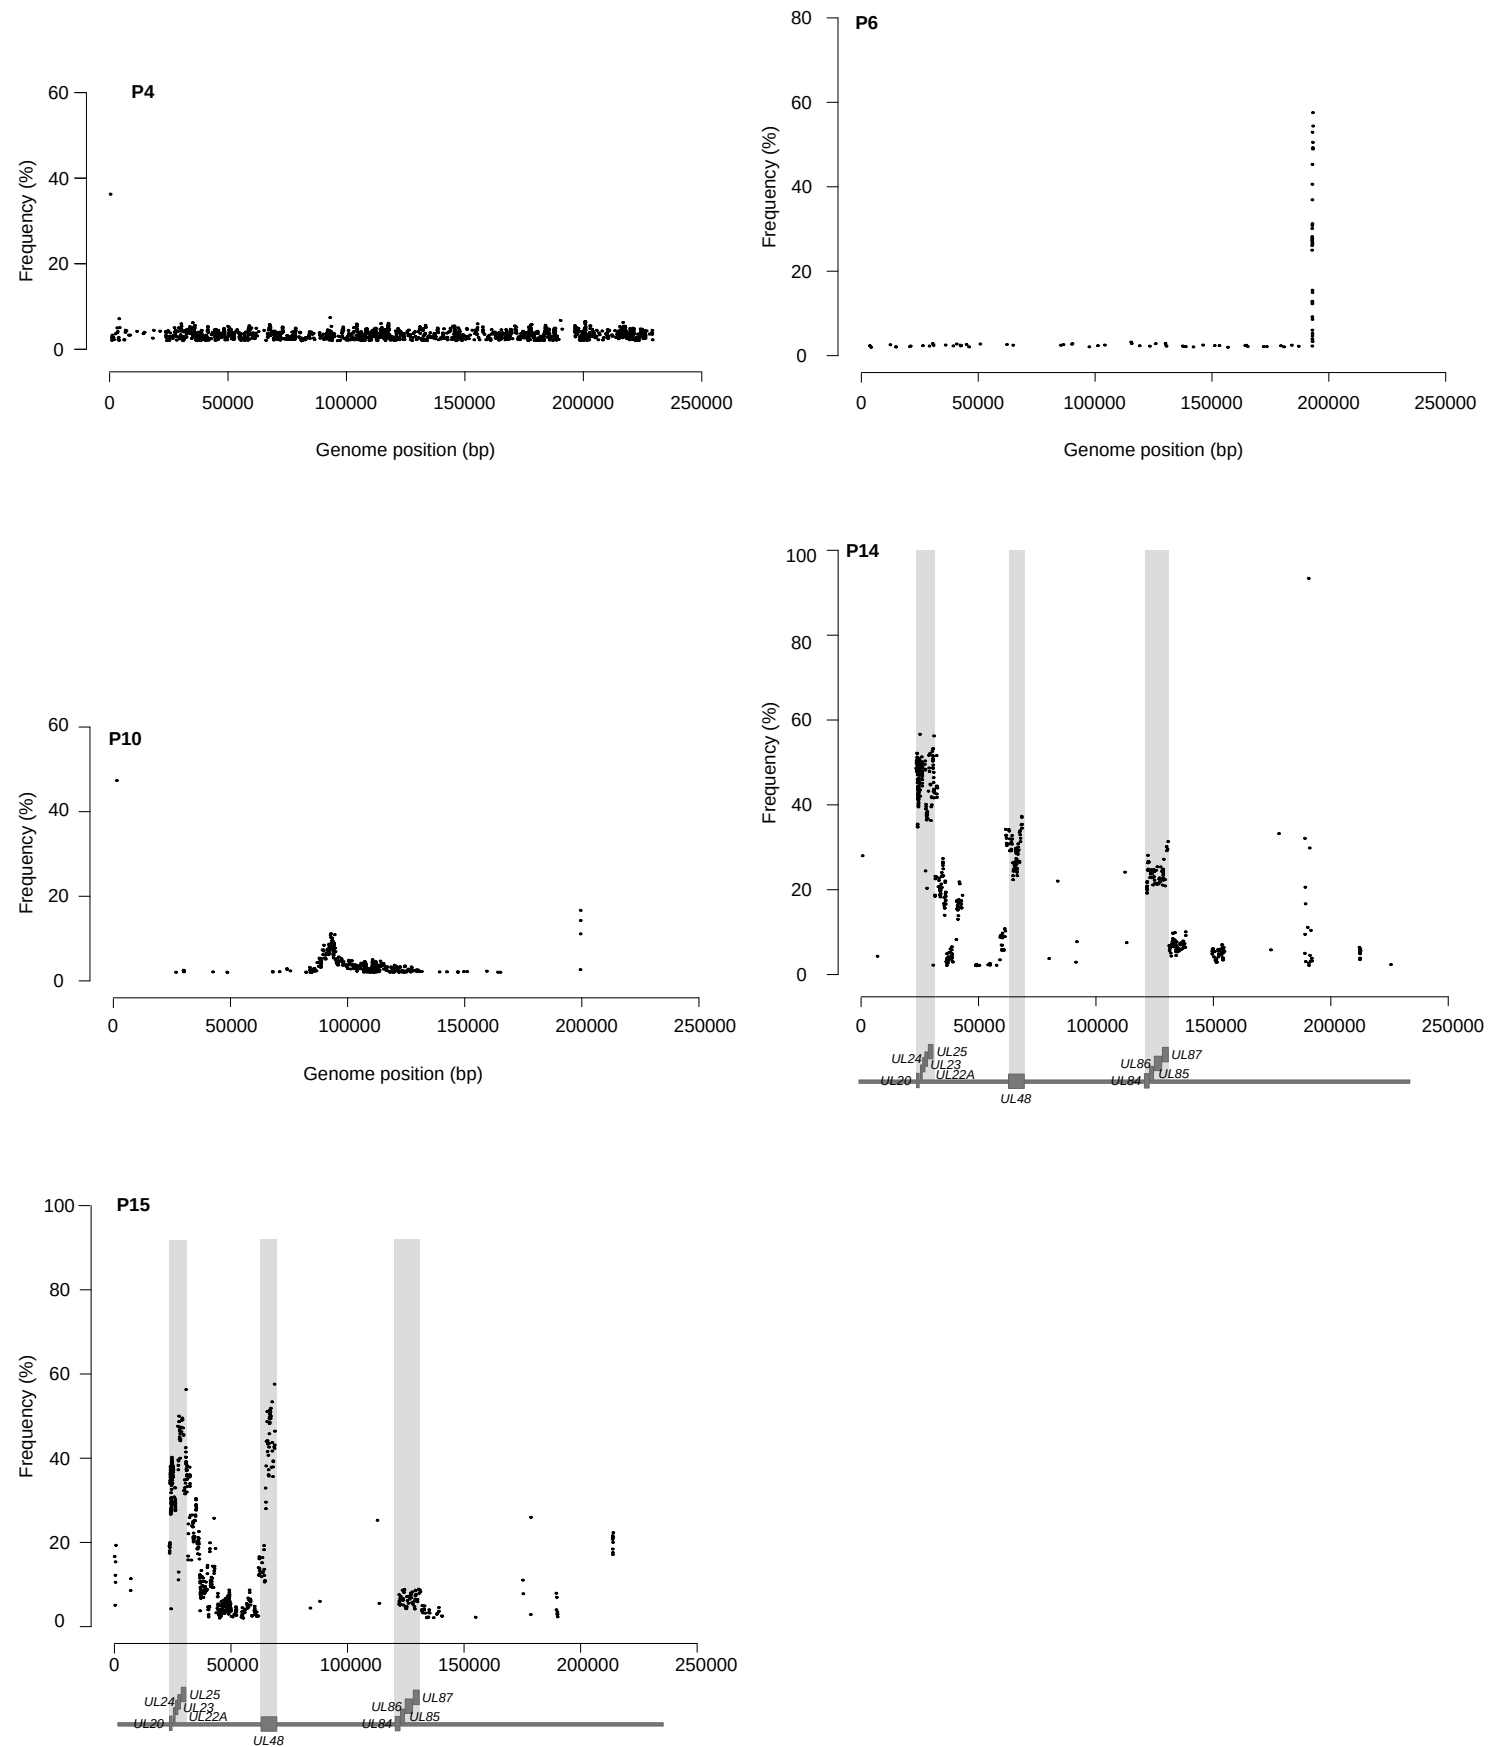

**Supplementary Figure 3.** Distribution of heterozygous variants. The genomic location and frequency of heterozygous variants is shown for all isolates. For P14 and P15, a schematic representation of the HCMV genome is shown at the bottom to visualize the regions where most high-frequency variants occur (shaded areas).
