# Supplementary material for: Genetic Variability of Human Cytomegalovirus Clinical Isolates Correlates With Altered Expression of Natural Killer Cell-Activating Ligands and IFN-γ
Source: PubMed Central journal article supplement (PMC8062705; doi:10.3389/fimmu.2021.532484), 2021-04-09
Supplement: Image_4.pdf [file Image_4.pdf]

**Supplementary Figure 4.** Protein alignment of proteins involved in the modulation of NK cell activation. The alignments of known proteins involved in NK cell modulation are shown for the five isolates. Amino acid changes are marked in red.

**RL11**

P4\_RL11 MQTYSTPLTLVIVTSLFLFTTQGSSSSNAVEPTKKPLKLANYRATCEDRTRTLVTRLNNTSH  
P6\_RL11 MQTYSTPLTLVIVTSLFLFTTQGSSSSNAVEPTKKPLKLANYRATCEDRTRTLVTRLNNTSH  
P14\_RL11 MQTYSTPLTLVIVTSLFLFTTQGSSSSNAVEPTKKPLKLANYRATCEDRTRTLVTRLNNTSH  
P15\_RL11 MQTYSTPLTLVIVTSLFLFTTQGSSSSNAVEPTKKPLKLANYRATCEDRTRTLVTRLNNTSH  
P10\_RL11 MQTYSTPLTLAIVTSLFLFTTQGSSSSNAVEPTKKPLKLANYRATCEDRTRTLVTRLNNTSH

P4\_RL11 HSVVWQRYDIYSRYMRRMPPLCIITDAYKETHQGGATFTCTRQNLTLYNLTVKDTGVYL  
P6\_RL11 HSVVWQRYDIYSRYMRRMPPLCIITDAYKETHQGGATFTCTRQNLTLYNLTVKDTGVYL  
P14\_RL11 HSVVWQRYDIYSRYMRRMPPLCIITDAYKETHQGGATFTCTRQNLTLYNLTVKDTGVYL  
P15\_RL11 HSVVWQRYDIYSRYMRRMPPLCIITDAYKETHQGGATFTCTRQNLTLYNLTVKDTGVYL  
P10\_RL11 HSVVWQRYDIYSRYMRRMPPLCIITDAYKETHQGGATFTCTRQNLTLYNLTVKDTGVYL

P4\_RL11 LQDQYTGDEAFYLIHPRSFCRALETRRCFYGPGRVVVTDSEADRAIISDLKRQWSG  
P6\_RL11 LQDQYTGDEAFYLIHPRSFCRALETRRCFYGPGRVVVTDSEADRAIISDLKRQWSG  
P14\_RL11 LQDQYTGDEAFYLIHPRSFCRALETRRCFYGPGRVVVTDSEADRAIISDLKRQWSG  
P15\_RL11 LQDQYTGDEAFYLIHPRSFCRALETRRCFYGPGRVVVTDSEADRAIISDLKRQWSG  
P10\_RL11 LQDQYTGDEAFYLIHPRSFCRALETRRCFYGPGRVVVTDSEADRAIISDLKRQWSG

P4\_RL11 LSLHCAWVSGLMIFVGALVICFLRSQRIGEQAERLRTDLDEPLLLLTVDGDLE  
P6\_RL11 LSLHCAWVSGLMIFVGALVICFLRSQRIGEQAERLRTDLDEPLLLLTVDGDLE  
P14\_RL11 LSLHCAWVSGLMIFVGALVICFLRSQRIGEQAERLRTDLDEPLLLLTVDGDLE  
P15\_RL11 LSLHCAWVSGLMIFVGALVICFLRSQRIGEQAERLRTDLDEPLLLLTVDGDLE  
P10\_RL11 LSLHCAWVSGLMIFVGALVICFLRSQRIGEQAERLRTDLDEPLLLLTVDGDLE

**UL16**

P4\_UL16 MERRRGTVPLGWFFVLCLSSAPCAVDLGSKSSNSTCRNLNVELASIHGGETWTLHGMC  
P6\_UL16 MERRRGTVPLGWFFVLCLSSAPCAVDLGSKSSNSTCRNLNVELASIHGGETWTLHGMC  
P14\_UL16 MERRRGTVPLGWFFVLCLSSAPCAVDLGSKSSNSTCRNLNVELASIHGGETWTLHGMC  
P15\_UL16 MERRRGTVPLGWFFVLCLSSAPCAVDLGSKSSNSTCRNLNVELASIHGGETWTLHGMC  
P10\_UL16 MERRRGTVPLGWFFVLCLSSAPCAVDLGSKSSNSTCRNLNVELASIHGGETWTLHGMC

P4\_UL16 ISICYENVTEDEIIGVAFTWQHNSVVDLWLYQNDTVIRNFSDITTNILQDGLKMRTVP  
P6\_UL16 ISICYENVTEDEIIGVAFTWQHNSVVDLWLYQNDTVIRNFSDITTNILQDGLKMRTVP  
P14\_UL16 ISICYENVTEDEIIGVAFTWQHNSVVDLWLYQNDTVIRNFSDITTNILQDGLKMRTVP  
P15\_UL16 ISICYENVTEDEIIGVAFTWQHNSVVDLWLYQNDTVIRNFSDITTNILQDGLKMRTVP  
P10\_UL16 ISICYENVTEDEIIGVAFTWQHNSVVDLWLYQNDTVIRNFSDITTNILQDGLKMRTVP

P4\_UL16 VTKLYTSRMVTNLTVGRYDCLRCENGTMKIIERLYVRLGSLYPRPPGSLAKHPSVSADE  
P6\_UL16 VTKLYTSRMVTNLTVGRYDCLRCENGTMKIIERLYVRLGSLYPRPPGSLAKHPSVSADE  
P14\_UL16 VTKLYTSRMVTNLTVGRYDCLRCENGTMKIIERLYVRLGSLYPRPPGSLAKHPSVSADE  
P15\_UL16 VTKLYTSRMVTNLTVGRYDCLRCENGTMKIIERLYVRLGSLYPRPPGSLAKHPSVSADE  
P10\_UL16 VTKLYTSRMVTNLTVGRYDCLRCENGTMKIIERLYVRLGSLYPRPPGSLAKHPSVSADE

P4\_UL16 ELSATLARDIVLVSAILTFFLLALRIPQRLCQRLRIRLPHRYQRLRTED  
P6\_UL16 ELSATLARDIVLVSAILTFFLLALRIPQRLCQRLRIRLPHRYQRLRTED  
P14\_UL16 ELSATLARDIVLVSAILTFFLLALRIPQRLCQRLRIRLPHRYQRLRTED  
P15\_UL16 ELSATLARDIVLVSAILTFFLLALRIPQRLCQRLRIRLPHRYQRLRTED  
P10\_UL16 ELSATLARDIVLVSAILTFFLLALRIPQRLCQRLRIRLPHRYQRLRTED

**UL18**

P4\_UL18 MMTTWCLTLFVLWMLRVVGMHVLRYGYTGIFDDTSHMTLTVVGFIDGQHFFTYHVNSSDR  
P6\_UL18 MMTTWCLTLFVLWMLRVVGMHVLRYGYTGIFDDTSHMTLTVVGFIDGQHFFTYHVNSSDR  
P14\_UL18 MMTTWCLTLFVLWMLRVVGMHVLRYGYTGIFDDTSHMTLTVVGFIDGQHFFTYHVNSSDR  
P15\_UL18 MMTTWCLTLFVLWMLRVVGMHVLRYGYTGIFDDTSHMTLTVVGFIDGQHFFTYHVNSSDR  
P10\_UL18 MMTTWCLTLFVLWMLRVVGMHVLRYGYTGIFDDTSHMTLTVVGFIDGQHFFTYHVNSSDK

P4\_UL18 TSSRANGTISWMANVSAAYPTYLDGERAKGDLIFNQTEQNLLELEIALGYRSQSVLTWTH  
P6\_UL18 TSSRANGTISWMANVSAAYPTYLDGERAKGDLIFNQTEQNLLELEIALGYRSQSVLTWTH  
P14\_UL18 TSSRANGTISWMANVSAAYPTYLDGERAKGDLIFNQTEQNLLELEIALGYRSQSVLTWTH

P15\_UL18 TSSRRANGTISWMANVSAAYPTYLDGERAKGDLIFNQTEQNLELEIALGYRSQSVLTWTH  
P10\_UL18 ASSRRANGTISWMANVSAAYPTYLDGERAKGDLIFNQTEQNLELEIALGYRSQSVLTWTH

P4\_UL18 ECNTTENGSFVAGYEGFGWDGETLMELKDNLTLWTGPNYEISWLKQNKTYIDGKIKNISE  
P6\_UL18 ECNTTENGSFVAGYEGFGWDGETLMELKDNLTLWTGPNYEISWLKQNKTYIDGKIKNISE  
P14\_UL18 ECNTTENGSFVAGYEGFGWDGETLMELKDNLTLWTGPNYEISWLKQNKTYIDGKIKNISE  
P15\_UL18 ECNTTENGSFVAGYEGFGWDGETLMELKDNLTLWTGPNYEISWLKQNKTYIDGKIKNISE  
P10\_UL18 ECNTTENGSFVAGYEGFGWDGETLMELKDNLTLWTGPNYEISWLKQNKTYIDGKIKNISE

P4\_UL18 GDTTIQRNYLKGNCQWSVIYSGFQTPVTHPVVKGVRNQNDNRAEAFCTSYGFFPGEIN  
P6\_UL18 GDTTIQRNYLKGNCQWSVIYSGFQTPVTHPVVKGVRNQNDNRAEAFCTSYGFFPGEIN  
P14\_UL18 GDTTIQRNYLKGNCQWSVIYSGFQTPVTHPVVKGVRNQNDNRAEAFCTSYGFFPGEIN  
P15\_UL18 GDTTIQRNYLKGNCQWSVIYSGFQTPVTHPVVKGVRNQNDNRAEAFCTSYGFFPGEIN  
P10\_UL18 GDTTIQRNYLKGNCQWSVIYSGFQTPVTHPVVKGVRNQNDNRAEAFCTSYGFFPGEIN

P4\_UL18 ITFIHYGDKVPEDSEPQCNPPLPTLDGTFHQGCYVAIFCNQNYTCRVTHGNWTVEIPIISV  
P6\_UL18 ITFIHYGDKVPEDSEPQCNPPLPTLDGTFHQGCYVAIFCNQNYTCRVTHGNWTVEIPIISV  
P14\_UL18 ITFIHYGDKVPEDSEPQCNPPLPTLDGTFHQGCYVAIFCNQNYTCRVTHGNWTVEIPIISV  
P15\_UL18 ITFIHYGDKVPEDSEPQCNPPLPTLDGTFHQGCYVAIFCNQNYTCRVTHGNWTVEIPIISV  
P10\_UL18 ITFIHYGNKAPDDESEPQCNPPLPTLDGTFHQGCYVAIFCNQNYTCRVTHGNWTVEIPIISV

P4\_UL18 TSPDSSSGEVPDHPTANKRYNTMTISSVLLALLLALLCALLFAFLHYFTTLKQYLRNLAFW  
P6\_UL18 TSPDSSSGEVPDHPTANKRYNTMTISSVLLALLLALLCALLFAFLHYFTTLKQYLRNLAFW  
P14\_UL18 TSPDSSSGEVPDHPTANKRYNTMTISSVLLALLLALLCALLFAFLHYFTTLKQYLRNLAFW  
P15\_UL18 TSPDSSSGEVPDHPTANKRYNTMTISSVLLALLLALLCALLFAFLHYFTTLKQYLRNLAFW  
P10\_UL18 TSPDSSSGEVPDHPTANKRYNTMTISSVLLALLLALLCALLFAFLHYFTTLKQYLRNLAFW

P4\_UL18 RYRKVRSS  
P6\_UL18 RYRKVRSS  
P14\_UL18 RYRKVRSS  
P15\_UL18 RYRKVRSS  
P10\_UL18 RYRKVRSS

**UL40**

P4\_UL40 MNKFSNTRIGFTCAVMAPRTLVLTLGLLCMRIRSLSSPAETTVTAGVTSAHGPLCPLV  
P6\_UL40 MNKFSNTRIGFTCAVMAPRTLVLTLGLLCMRIRSLSSPAETTVTAGVTSAHGPLCPLV  
P14\_UL40 MNKFSNTRIGFTCAVMAPRTLVLTLGLLCMRIRSLSSPAETTVTAGVTSAHGPLCPLV  
P15\_UL40 MNKFSNTRIGFTCAVMAPRTLVLTLGLLCMRIRSLSSPAETTVTAGVTSAHGPLCPLV  
P10\_UL40 MNKFSNTRIGFTCAVAPRTLILTLGLLCMRIRSLSSPAETTVTAGVTSAHGPLCPLV

P4\_UL40 FQGWAYAVYHQGDMLMTLDVYCCRQTSNNTAVAFSRHLAVNTLLIEVGNTHRRADGVS  
P6\_UL40 FQGWAYAVYHQGDMLMTLDVYCCRQTSNNTAVAFSRHLAVNTLLIEVGNTHRRADGVS  
P14\_UL40 FQGWAYAVYHQGDMLMTLDVYCCRQTSNNTAVAFSRHLAVNTLLIEVGNTHRRADGVS  
P15\_UL40 FQGWAYAVYHQGDMLMTLDVYCCRQTSNNTAVAFSRHLAVNTLLIEVGNTHRRADGVS  
P10\_UL40 FQGWAYAVYHQGDMLMTLDVYCCRQTSNNTAVAFSRHLAVNTLLIEVGNTHRRADGVS

P4\_UL40 CLDHFRAQHQCPCPAQTVHVRGVNESAFGITHLQSCCLNEHSQLSERVAYHLKLRPATFGL  
P6\_UL40 CLDHFRAQHQCPCPAQTVHVRGVNESAFGITHLQSCCLNEHSQLSERVAYHLKLRPATFGL  
P14\_UL40 CLDHFRAQHQCPCPAQTVHVRGVNESAFGITHLQSCCLNEHSQLSERVAYHLKLRPATFGL  
P15\_UL40 CLDHFRAQHQCPCPAQTVHVRGVNESAFGITHLQSCCLNEHSQLSERVAYHLKLRPATFGL  
P10\_UL40 CLDHFRAQHQCPCPAQTVHVRGVNESAFGLTHLQSCCLNEHSQLSERVAYHLKLRPATFGL

P4\_UL40 ETWAMYTVGILALGSFSSFYQIARSLGVLPNDDHYYALKKA  
P6\_UL40 ETWAMYTVGILALGSFSSFYQIARSLGVLPNDDHYYALKKA  
P14\_UL40 ETWAMYTVGILALGSFSSFYQIARSLGVLPNDDHYYALKKA  
P15\_UL40 ETWAMYTVGILALGSFSSFYQIARSLGVLPNDDHYYALKKA  
P10\_UL40 ETWAMYTVGILALGSFSSFYQIARSLGVLPNDDHYYALKKA

**UL83**

P4\_UL83 MESRRRCPPDMISVLGPISGHVLKAVFSRGDTPVLPHETRLQTGIHVRVSPSLILVSQ  
P6\_UL83 MESRRRCPPDMISVLGPISGHVLKAVFSRGDTPVLPHETRLQTGIHVRVSPSLILVSQ  
P14\_UL83 MESRRRCPPDMISVLGPISGHVLKAVFSRGDTPVLPHETRLQTGIHVRVSPSLILVSQ  
P15\_UL83 MESRRRCPPDMISVLGPISGHVLKAVFSRGDTPVLPHETRLQTGIHVRVSPSLILVSQ  
P10\_UL83 MESRRRCPEMISVLGPISGHVLKAVFSRGDTPVLPHETRLQTGIHVRVSPSLILVSQ

P4\_UL83 YTPDSTPCHRGDNLQVQHTYFTGSEVENSVNVHNPTGRSICPSQEPMSIYVYALPLKM  
P6\_UL83 YTPDSTPCHRGDNLQVQHTYFTGSEVENSVNVHNPTGRSICPSQEPMSIYVYALPLKM  
P14\_UL83 YTPDSTPCHRGDNLQVQHTYFTGSEVENSVNVHNPTGRSICPSQEPMSIYVYALPLKM

P15\_UL83 YTPDSTPCHRGDNQLQVQHTYFTGSEVENVSVNVHNPTGRSICPSQEPMSIYVYALPLKM  
P10\_UL83 YTPDSTPCHRGDNQLQVQHTYFTGSEVENVSVNVHNPTGRSICPSQEPMSIYVYALPLKM

P4\_UL83 LNIPISINVHHYPSAAERKHRHLPVADAVIHASGKQMWQARLTVSGLAWTRQQNQWKEPDV  
P6\_UL83 LNIPISINVHHYPSAAERKHRHLPVADAVIHASGKQMWQARLTVSGLAWTRQQNQWKEPDV  
P14\_UL83 LNIPISINVHHYPSAAERKHRHLPVADAVIHASGKQMWQARLTVSGLAWTRQQNQWKEPDV  
P15\_UL83 LNIPISINVHHYPSAAERKHRHLPVADAVIHASGKQMWQARLTVSGLAWTRQQNQWKEPDV  
P10\_UL83 LNIPISINVHHYPSAAERKHRHLPVADAVIHASGKQMWQARLTVSGLAWTRQQNQWKEPDV

P4\_UL83 YYTSAFVFPKTDVALRHVVCAHELVCSEMENTRATKMQVIGDQYVKVYLESFCEDVPSGKL  
P6\_UL83 YYTSAFVFPKTDVALRHVVCAHELVCSEMENTRATKMQVIGDQYVKVYLESFCEDVPSGKL  
P14\_UL83 YYTSAFVFPKTDVALRHVVCAHELVCSEMENTRATKMQVIGDQYVKVYLESFCEDVPSGKL  
P15\_UL83 YYTSAFVFPKTDVALRHVVCAHELVCSEMENTRATKMQVIGDQYVKVYLESFCEDVPSGKL  
P10\_UL83 YYTSAFVFPKTDVALRHVVCAHELVCSEMENTRATKMQVIGDQYVKVYLESFCEDVPSGKL

P4\_UL83 FMHVTLGSDVEEDLTMRNPQPFMRPHERNGFTVLCPKNMIKPGKISHIMLDVAFTSHE  
P6\_UL83 FMHVTLGSDVEEDLTMRNPQPFMRPHERNGFTVLCPKNMIKPGKISHIMLDVAFTSHE  
P14\_UL83 FMHVTLGSDVEEDLTMRNPQPFMRPHERNGFTVLCPKNMIKPGKISHIMLDVAFTSHE  
P15\_UL83 FMHVTLGSDVEEDLTMRNPQPFMRPHERNGFTVLCPKNMIKPGKISHIMLDVAFTSHE  
P10\_UL83 FMHVTLGSDVEEDLTMRNPQPFMRPHERNGFTVLCPKNMIKPGKISHIMLDVAFTSHE

P4\_UL83 HFGLLCPKSIPGLSISGNLLMNGQQIFLEVQAI RETVELRQYDPVAALFFFDIDLLLQRG  
P6\_UL83 HFGLLCPKSIPGLSISGNLLMNGQQIFLEVQAI RETVELRQYDPVAALFFFDIDLLLQRG  
P14\_UL83 HFGLLCPKSIPGLSISGNLLMNGQQIFLEVQAI RETVELRQYDPVAALFFFDIDLLLQRG  
P15\_UL83 HFGLLCPKSIPGLSISGNLLMNGQQIFLEVQAI RETVELRQYDPVAALFFFDIDLLLQRG  
P10\_UL83 HFGLLCPKSIPGLSISGNLLMNGQQIFLEVQAI RETVELRQYDPVAALFFFDIDLLLQRG

P4\_UL83 PQYSEHPTFTSQYRIQGGKLEYRHTWDRHDEGAAQGGDDVWTS GSDSDEELVTTERKT  
P6\_UL83 PQYSEHPTFTSQYRIQGGKLEYRHTWDRHDEGAAQGGDDVWTS GSDSDEELVTTERKT  
P14\_UL83 PQYSEHPTFTSQYRIQGGKLEYRHTWDRHDEGAAQGGDDVWTS GSDSDEELVTTERKT  
P15\_UL83 PQYSEHPTFTSQYRIQGGKLEYRHTWDRHDEGAAQGGDDVWTS GSDSDEELVTTERKT  
P10\_UL83 PQYSEHPTFTSQYRIQGGKLEYRHTWDRHDEGAAQGGDDVWTS GSDSDEELVTTERKT

P4\_UL83 TGGGAMAGASTSAGRKRKSASSATACTAGVMTRGRLKAESTVAPEEDTDESDNEIHNPA  
P6\_UL83 TGGGAMAGASTSAGRKRKSASSATACTAGVMTRGRLKAESTVAPEEDTDESDNEIHNPA  
P14\_UL83 TGGGAMAGASTSAGRKRKSASSATACTAGVMTRGRLKAESTVAPEEDTDESDNEIHNPA  
P15\_UL83 TGGGAMAGASTSAGRKRKSASSATACTAGVMTRGRLKAESTVAPEEDTDESDNEIHNPA  
P10\_UL83 TGGGAMAGASTSAGRKRKSASSATACTAGVMTRGRLKAESTVAPEEDTDESDNEIHNPA

P4\_UL83 VFTWPPWQAGILARNL VPMVATVQGQNLKYQEFFWDANDIYRIFAELG VWPAAQPKRR  
P6\_UL83 VFTWPPWQAGILARNL VPMVATVQGQNLKYQEFFWDANDIYRIFAELG VWPAAQPKRR  
P14\_UL83 VFTWPPWQAGILARNL VPMVATVQGQNLKYQEFFWDANDIYRIFAELG VWPAAQPKRR  
P15\_UL83 VFTWPPWQAGILARNL VPMVATVQGQNLKYQEFFWDANDIYRIFAELG VWPAAQPKRR  
P10\_UL83 VFTWPPWQAGILARNL VPMVATVQGQNLKYQEFFWDANDIYRIFAELG VWPAAQPKRR

P4\_UL83 RHRQEALPGPCIASTPKKHRG  
P6\_UL83 RHRQEALPGPCIASTPKKHRG  
P14\_UL83 RHRQEALPGPCIASTPKKHRG  
P15\_UL83 RHRQEALPGPCIASTPKKHRG  
P10\_UL83 RHRQEALPGPCIASTPKKHRG

**UL112**

P4\_UL112 MDLPTTVRKYWTFANPNRILHQSVNQTFDVRQFVFDARLVNCVDGDKVLHLNKGWLC  
P6\_UL112 MDLPTTVRKYWTFANPNRILHQSVNQTFDVRQFVFDARLVNCVDGDKVLHLNKGWLC  
P14\_UL112 MDLPTTVRKYWTFANPNRILHQSVNQTFDVRQFVFDARLVNCVDGDKVLHLNKGWLC  
P15\_UL112 MDLPTTVRKYWTFANPNRILHQSVNQTFDVRQFVFDARLVNCVDGDKVLHLNKGWLC  
P10\_UL112 MDLPTTVRKYWTFANPNRILHQSVNQTFDVRQFVFDARLVNCVDGDKVLHLNKGWLC

P4\_UL112 ATIMQHGEASAGAKTQQGFMSIDITGDGELQEHLFVRGGIVFNKSVSSVVGSSGPNESAL  
P6\_UL112 ATIMQHGEASAGAKTQQGFMSIDITGDGELQEHLFVRGGIVFNKSVSSVVGSSGPNESAL  
P14\_UL112 ATIMQHGEASAGAKTQQGFMSIDITGDGELQEHLFVRGGIVFNKSVSSVVGSSGPNESAL  
P15\_UL112 ATIMQHGEASAGAKTQQGFMSIDITGDGELQEHLFVRGGIVFNKSVSSVVGSSGPNESAL  
P10\_UL112 ATIMQHGEASAGAKTQQGFMSIDITGDGELQEHLFVRGGIVFNKSVSSVVGSSGPNESAL

P4\_UL112 LTMISEGNLQVTVYRHYLKNHGESSSGGGCGAASTASAVCVSSLGSGGTRDGPSAEE  
P6\_UL112 LTMISEGNLQVTVYRHYLKNHGESSSGGGCGAASTASAVCVSSLGSGGTRDGPSAEE  
P14\_UL112 LTMISEGNLQVTVYRHYLKNHGESSSGGGCGAASTASAVCVSSLGSGGTRDGPSAEE  
P15\_UL112 LTMISEGNLQVTVYRHYLKNHGESSSGGGCGAASTASAVCVSSLGSGGTRDGPSAEE  
P10\_UL112 LTMISEGNLQVTVYRHYLKNHGESSSGGGCGAASTASAVCVSSLGSGGTRDGPSAEE

P4\_UL112 QQRRRQEQRHEERRKSSSSAGGGGGGGTGGGGGGGGGQHSSSDSANGLLRDPRLMNRQ

P6\_UL112 QQRRRQEQRHEERRKSSSSAGGGGGGGTGGGGGGGGSGGQHSSDSANGLLRDPRLMNRQ  
P14\_UL112 QQRRRQEQRHEERRKSSSSAGGGGGGGTGGGGGGGGSGGQHSSDSANGLLRDPRLMNRQ  
P15\_UL112 QQRRRQEQRHEERRKSSSSAGGGGGGGTGGGGGGGGSGGQHSSDSANGLLRDPRLMNRQ  
P10\_UL112 QQRRRQEQRHEERRKSSSSAGGGGGGGAGGGGGGGSGGQHSSDSANGLLRDPRLMNRQ

P4\_UL112 KERRPPSSSENDGSPPLREAKRQKTTAQHEGHGGGKNETEQQSGGAGGGGGGGSGRMSL  
P6\_UL112 KERRPPSSSENDGSPPLREAKRQKTTAQHEGHGGGKNETEQQSGGAGGGGGGGSGRMSL  
P14\_UL112 KERRPPSSSENDGSPPLREAKRQKTTAQHEGHGGGKNETEQQSGGAGGGGGGGSGRMSL  
P15\_UL112 KERRPPSSSENDGSPPLREAKRQKTTAQHEGHGGGKNETEQQSGGAGGGGGGGSGRMSL  
P10\_UL112 KERRPPSSSENDGSPPLREAKRQKTTAQHEGHGGGKNETEQQSGGAGGGGGGGSGRMSL

P4\_UL112 PLDTSEAVAFNLNYSSSSSAVSSSSNNHHHHHHHNAVTDVAAGTDGALLLPIERGAVVSS  
P6\_UL112 PLDTSEAVAFNLNYSSSSSAVSSSSNNHHHHHHHNAVTDVAAGTDGALLLPIERGAVVSS  
P14\_UL112 PLDTSEAVAFNLNYSSSSSAVSSSSNNHHHHHHHNAVTDVAAGTDGALLLPIERGAVVSS  
P15\_UL112 PLDTSEAVAFNLNYSSSSSAVSSSSNNHHHHHHHNAVTDVAAGTDGALLLPIERGAVVSS  
P10\_UL112 PLDTSEAVAFNLNYSSSSSAVSSSSNNHHHHHHHNAVTDVAAGTDGALLLPIERGAVVSS

P4\_UL112 PSSTSPSSLLSLPRPSSAHSAGETVQESEAATAAAAGLMMRRMRRAPAEAAEAPPQSE  
P6\_UL112 PSSTSPSSLLSLPRPSSAHSAGETVQESEAATAAAAGLMMRRMRRAPAEAAEAPPQSE  
P14\_UL112 PSSTSPSSLLSLPRPSSAHSAGETVQESEAATAAAAGLMMRRMRRAPAEAAEAPPQSE  
P15\_UL112 PSSTSPSSLLSLPRPSSAHSAGETVQESEAATAAAAGLMMRRMRRAPAEAAEAPPQSE  
P10\_UL112 PSSTSPSSLLSLPRPSSAHSAGETVQESEAATAAAAGLMMRRMRRAPAEAAEAPPQSE

P4\_UL112 EENDSTTPVSNCRVPPNSQESAAPQPPRSPRFDDIIQSLTKMLNDCKEKRLCDLPLVSSR  
P6\_UL112 EENDSTTPVSNCRVPPNSQESAAPQPPRSPRFDDIIQSLTKMLNDCKEKRLCDLPLVSSR  
P14\_UL112 EENDSTTPVSNCRVPPNSQESAAPQPPRSPRFDDIIQSLTKMLNDCKEKRLCDLPLVSSR  
P15\_UL112 EENDSTTPVSNCRVPPNSQESAAPQPPRSPRFDDIIQSLTKMLNDCKEKRLCDLPLVSSR  
P10\_UL112 EENDSTTPVSNCRVPPNSQESAAPQPPRSPRFDDIIQSLTKMLNDCKEKRLCDLPLVSSR

P4\_UL112 LLPETSGGTVVVNHSSVARTAAAVSTAGVGPPAAACPLVTTGVVPSGVSAGVAPVAAAV  
P6\_UL112 LLPETSGGTVVVNHSSVARTAAAVSTAGVGPPAAACPLVTTGVVPSGVSAGVAPVAAAV  
P14\_UL112 LLPETSGGTVVVNHSSVARTAAAVSTAGVGPPAAACPLVTTGVVPSGVSAGVAPVAAAV  
P15\_UL112 LLPETSGGTVVVNHSSVARTAAAVSTAGVGPPAAACPLVTTGVVPSGVSAGVAPVAAAV  
P10\_UL112 LLPETSGGTVVVNHSSVARTAAAVSTAGVGPPAAACPLVTTGVVPSGVSAGVAPVAAAV

P4\_UL112 ETPAAPRPVCEIKPYVVPVAVATAAAASNSSSSSSTPLPPPPPPGGRRGRARNNTRGG  
P6\_UL112 ETPAAPRPVCEIKPYVVPVAVATAAAASNSSSSSSTPLPPPPPPGGRRGRARNNTRGG  
P14\_UL112 ETPAAPRPVCEIKPYVVPVAVATAAAASNSSSSSSTPLPPPPPPGGRRGRARNNTRGG  
P15\_UL112 ETPAAPRPVCEIKPYVVPVAVATAAAASNSSSSSSTPLPPPPPPGGRRGRARNNTRGG  
P10\_UL112 ETPAAPRPVCEIKPYVVPVAVATAAAASNSSSSSAPLPPPPPPGGRRGRARNNTRGG

P4\_UL112 GGGGGGRNSRRQAASSSSSSRRSRRRNRHEDEDNDPLLRLSQVAGSRRRGPSFLEDG  
P6\_UL112 GGGGGGRNSRRQAASSSSSSRRSRRRNRHEDEDNDPLLRLSQVAGSRRRGPSFLEDG  
P14\_UL112 GGGGGGRNSRRQAASSSSSSRRSRRRNRHEDEDNDPLLRLSQVAGSRRRGPSFLEDG  
P15\_UL112 GGGGGGRNSRRQAASSSSSSRRSRRRNRHEDEDNDPLLRLSQVAGSRRRGPSFLEDG  
P10\_UL112 GGGGGGRNSRRQAASSSSSSRRSRRRNRHEDEDNDPLLRLSQVAGSRRRGPSFLEDG

P4\_UL112 LEIIDPSEEAIAAASIAAFFDD  
P6\_UL112 LEIIDPSEEAIAAASIAAFFDD  
P14\_UL112 LEIIDPSEEAIAAASIAAFFDD  
P15\_UL112 LEIIDPSEEAIAAASIAAFFDD  
P10\_UL112 LEIIDPSEEAIAAASIAAFFDD

**UL119**

P4\_UL119 MCPVLAIVLVALLGDTHPGVESSTTSAVTSPSNTTATSTTSISTSNNVTSAVTTTVQTS  
P6\_UL119 MCPVLAIVLVALLGDTHPGVESSTTSAVTSPSNTTATSTTSISTSNNVTSAVTTTVQTS  
P14\_UL119 MCPVLAIVLVALLGDTHPGVESSTTSAVTSPSNTTATSTTSISTSNNVTSAVTTTVQTS  
P15\_UL119 MCPVLAIVLVALLGDTHPGVESSTTSAVTSPSNTTATSTTSISTSNNVTSAVTTTVQTS  
P10\_UL119 MCSVLAIALVALLGDMHPGVKSSTTSAVTSPSNTTVTSTTSISTSNNVSSAVTTTVQTS

P4\_UL119 TSSASTSVIATTQKEGRLYTVNCEASYSYDQVSLNATCKVILLNNTKPNPILSVTCYART  
P6\_UL119 TSSASTSVIATTQKEGRLYTVNCEASYSYDQVSLNATCKVILLNNTKPNPILSVTCYART  
P14\_UL119 TSSASTSVIATTQKEGRLYTVNCEASYSYDQVSLNATCKVILLNNTKPNPILSVTCYART  
P15\_UL119 TSSASTSVIATTQKEGRLYTVNCEASYSYDQVSLNATCKVILLNNTKPNPILSVTCYART  
P10\_UL119 TSSASTSVIATTQKEGRHLYTVNCEASYSYDQVSLNATCKVILLNNTKPNPILSVTCYART

P4\_UL119 DCKGPFTQVGYLSAFPDPNEGKHLHLSYNATAQELLISGLRPQETTEYTCFFSWGRHHNA  
P6\_UL119 DCKGPFTQVGYLSAFPDPNEGKHLHLSYNATAQELLISGLRPQETTEYTCFFSWGRHHNA  
P14\_UL119 DCKGPFTQVGYLSAFPDPNEGKHLHLSYNATAQELLISGLRPQETTEYTCFFSWGRHHNA  
P15\_UL119 DCKGPFTQVGYLSAFPDPNEGKHLHLSYNATAQELLISGLRPQETTEYTCFFSWGRHHNA  
P10\_UL119 DCKGPFTQVGYLSAFPNDKGLHLSYNATAQELLISGLRPQETTEYTCFFSWGRHHNA

P4\_UL119 TWDLFTYPIYAVYGTRLNATTMRVRVLLQEHEHCLLNGSSLYHPNSTVHLHQGNQLIPPW  
P6\_UL119 TWDLFTYPIYAVYGTRLNATTMRVRVLLQEHEHCLLNGSSLYHPNSTVHLHQGNQLIPPW  
P14\_UL119 TWDLFTYPIYAVYGTRLNATTMRVRVLLQEHEHCLLNGSSLYHPNSTVHLHQGNQLIPPW  
P15\_UL119 TWDLFTYPIYAVYGTRLNATTMRVRVLLQEHEHCLLNGSSLYHPNSTVHLHQGNQLIPPW  
P10\_UL119 TWDLFTYPIYAVYGTRLNATTMRVRVLLQEHEHCLLNGSSLYHPNSTVHLHQGNQLIPPW

P4\_UL119 NISNVTYNGQRLREFVFYLNQTYTVVRLHVQIAGRSFTTTYVFIKSDPLFEDRLLAYGVL  
P6\_UL119 NISNVTYNGQRLREFVFYLNQTYTVVRLHVQIAGRSFTTTYVFIKSDPLFEDRLLAYGVL  
P14\_UL119 NISNVTYNGQRLREFVFYLNQTYTVVRLHVQIAGRSFTTTYVFIKSDPLFEDRLLAYGVL  
P15\_UL119 NISNVTYNGQRLREFVFYLNQTYTVVRLHVQIAGRSFTTTYVFIKSDPLFEDRLLAYGVL  
P10\_UL119 NISNVTYNGQRLREFVFYLNQTYTVVRLHVQIAGRSFTTTYVFIKSDPLFEDRLLAYGVL

P4\_UL119 AFLVFMVILLVYTYMLARRRDWSYKRLEEPVEEKKHPVPYFKQW  
P6\_UL119 AFLVFMVILLVYTYMLARRRDWSYKRLEEPVEEKKHPVPYFKQW  
P14\_UL119 AFLVFMVILLVYTYMLARRRDWSYKRLEEPVEEKKHPVPYFKQW  
P15\_UL119 AFLVFMVILLVYTYMLARRRDWSYKRLEEPVEEKKHPVPYFKQW  
P10\_UL119 AFLVFMVILLVYTYMLARRRDWSYKRLEEPVEEKKHPVPYFKQW

**UL135**

P4\_uL135 MVWLWLGVLLGGTGLASLVLAISLFTQRRGRKRSDETSSRGRLPGAASDKRGACACCYR  
P6\_UL135 MVWLWLGVLLGGTGLASLVLAISLFTQRRGRKRSDETSSRGRLPGAASDKRGACACCYR  
P10\_UL135 MVWLWLGVLLGGTGLASLVLAISLFTQRRGRKRSDETSSRGRLPGAASDKRGACACCYR  
P14\_UL135 MVWLWLGVLLGGTGLASLVLAISLFTQRRGRKRSDETSSRGRLPGAASDKRGACACCYR  
P15\_UL135 MVWLWLGVLLGGTGLASLVLAISLFTQRRGRKRSDETSSRGRLPGAASDKRGACACCYR

P4\_uL135 IPKEDVVEPLDLELGLMRVATHPPTQVPRCTSLYIGEDGLPIDKPEFPPARFEIPDVST  
P6\_UL135 IPKEDVVEPLDLELGLMRVATHPPTQVPRCTSLYIGEDGLPIDKPEFPPARFEIPDVST  
P10\_UL135 IPKEDVVEPLDLELGLMRVATHPPTQVPRCTSLYIGEDGLPIDKPEFPPARFEIPDVST  
P14\_UL135 IPKEDVVEPLDLELGLMRVATHPPTQVPRCTSLYIGEDGLPIDKPEFPPARFEIPDVST  
P15\_UL135 IPKEDVVEPLDLELGLMRVATHPPTQVPRCTSLYIGEDGLPIDKPEFPPARFEIPDVST

P4\_uL135 PGTPTSIGRSPSHCSSSSLSASSASVDTVLHQPPPSWKPPPPGRKKRPPTPPVRAPTTR  
P6\_UL135 PGTPTSIGRSPSHCSSSSLSASSASVDTVLHQPPPSWKPPPPGRKKRPPTPPVRAPTTR  
P10\_UL135 PGTPTSIGRSPSHCSSSSLSASSASVDTVLHQPPPSWKPPPPGRKKRPPTPPVRAPTTR  
P14\_UL135 PGTPTSIGRSPSHCSSSSLSASSASVDTVLHQPPPSWKPPPPGRKKRPPTPPVRAPTTR  
P15\_UL135 PGTPTSIGRSPSHCSSSSLSASSASVDTVLHQPPPSWKPPPPGRKKRPPTPPVRAPTTR

P4\_uL135 LSSHRPPTIPAPRKNLSTPPTKKTTPPTKPKPVGWTPPVTPRPFKTPTPQKPPRNPR  
P6\_UL135 LSSHRPPTIPAPRKNLSTPPTKKTTPPTKPKPVGWTPPVTPRPFKTPTPQKPPRNPR  
P10\_UL135 LSSHRPPTIPAPRKNLSTPPTKKTTPPTKPKPVGWTPPVTPRPFKTPTPQKPPRNPR  
P14\_UL135 LSSHRPPTIPAPRKNLSTPPTKKTTPPTKPKPVGWTPPVTPRPFKTPTPQKPPRNPR  
P15\_UL135 LSSHRPPTIPAPRKNLSTPPTKKTTPPTKPKPVGWTPPVTPRPFKTPTPQKPPRNPR

P4\_uL135 PRTVLENLSKVGLSCPCPRPRTPEPTTLPIVSVSELAPPPRWSIEELLEKAVQSVMK  
P6\_UL135 PRTVLENLSKVGLSCPCPRPRTPEPTTLPIVSVSELAPPPRWSIEELLEKAVQSVMK  
P10\_UL135 PRTVLENLSKVGLSCPCPRPRTPEPTTLPIVSVSELAPPPRWSIEELLEKAVQSVMK  
P14\_UL135 PRTVLENLSKVGLSCPCPRPRTPEPTTLPIVSVSELAPPPRWSIEELLEKAVQSVMK  
P15\_UL135 PRTVLENLSKVGLSCPCPRPRTPEPTTLPIVSVSELAPPPRWSIEELLEKAVQSVMK

P4\_uL135 DAESMQMT  
P6\_UL135 DAESMQMT  
P10\_UL135 DAESMQMT  
P14\_UL135 DAESMQMT  
P15\_UL135 DAESMQMT

**UL141**

P6\_UL141 MCRRESLRTLPLWFLVLLSCPRLLEYSSSSFPFATADIAEKMWAENYETTSPAPVLAEG  
P10\_UL141 MCRRESLRTLPLWFLVLLSCPRLLEYSSSSFPFATADIAEKMWAENYETTSPAPVLAEG

P6\_UL141 EQVTIPCTVMTHSWPMVSIARARFCRSHDGSDELILDAVKGHRLMNGLQYRLPYATWNFSQ  
P10\_UL141 EQVTIPCTVMTHSWPMVSIARARFCRSHDGSDELILDAVKGHRLMNGLQYRLPYATWNFSQ

P6\_UL141 LHLGQIFSLTFNVSTDTAGMYECLVLRNYSHGLIMQRFVILTQLETLSRPDEPCCTPALGR  
P10\_UL141 LHLGQIFSLTFNVSTDTAGMYECLVLRNYSHGLIMQRFVILTQLETLSRPDEPCCTPALGR

P6\_UL141 YSLGDQIWSPTPWRLRNHDCGMRYGFQRNYFYIGRADAEDCWKPACDDEEPDRCWTVIQR  
P10\_UL141 YSLGDQIWSPTPWRLRNHDCGMRYGFQRNYFYIGRADAEDCWKPACDDEEPDRCWTVIQR

P6\_UL141 YRLPGDCYRSQPHPPKFLPVTAPPADIDTGMSPWATRGIAAF LGFWSIFTVCFLCYLCY  
P10\_UL141 YRLPGDCYRSQPHPPKFLPVTAPPADIDTGMSPWATRGIAAF LGFWSIFTVCFLCYLCY

P6\_UL141 LQCCGRWCPTPGRGRRGGEGYRRLPTYDSYPGVKKMKR  
P10\_UL141 LQCCGRWCPTPGRGRRGGEGYRRLPTYDSYPGVKKMKR

**UL142**

P6\_UL142 MRIEWACWLFYGVSSVSGSERLSYRYHLESNSSANVVCNGNISVFNGLTGVRYNITVG  
P10\_UL142 MRIEWACWLFYGVSSVSGSERLSYRYHLESNSSANVVCNGNISVFNGLTGVRYNITVG

P6\_UL142 ISSSLLIGHLTIQTLESWFTSWVQNKSYKQPLSTTETLYNIDSENIHRVSQYFHTRWIK  
P10\_UL142 ISSSLLIGHLTIQTLESWFTSWVQNKSYKQPLSTTETLYNIDSENIHRVSQYFHTRWIK

P6\_UL142 SLQENHTCDLTNSTPTYTYQANVNTNYLTLTSSGWQDRLNYTAINSTHFNLTESNITSI  
P10\_UL142 SLQENHTCDLTNSTPTYTYQANVNTNYLTLTSSGWQDRLNYTAINSTHFNLTESNITSI

P6\_UL142 HKYLNTTCIERLRNYTLKSVYTTTVPQNVTTTPQHHTTTTLYTPPNAITIQDTTQSHTVQTP  
P10\_UL142 HKYLNTTCIERLRNYTLKSVYTTTVPQNVTTTPQHHTTTTLYTPPNAITIQDTTQSHTVQTP

P6\_UL142 SFNDTHNVEHTLNINYVLSQKTNNTTSPWVYAIPMGATATIGASLYIGKHFTPVRFVYE  
P10\_UL142 SFNDTHNVEHTLNINYVLSQKTNNTTSPWVYAIPMGATATIGASLYIGKHFTPVRFVYE

P6\_UL142 VWRGQ  
P10\_UL142 VWRGQ

**UL148**

P4\_UL148 MLRLLFTLVLLALHGPSVNASRDYVHVRLLSYRGDPLVFKHTFSGVRRPFTELGWAVCRD  
P6\_UL148 MLRLLFTLVLLALHGPSVNASRDYVHVRLLSYRGDPLVFKHTFSGVRRPFTELGWAVCRD  
P14\_UL148 MLRLLFTLVLLALHGPSVNASRDYVHVRLLSYRGDPLVFKHTFSGVRRPFTELGWAVCRD  
P15\_UL148 MLRLLFTLVLLALHGPSVNASRDYVHVRLLSYRGDPLVFKHTFSGVRRPFTELGWAVCRD  
P10\_UL148 MLRLLFTLVLLALHGPSVNASRDYVHVRLLSYRGDPLVFKHTFSGVRRPFTELGWAVCRD

P4\_UL148 WDSMHCTPFWSTDLEQMTDSVRRYSTVSPGKEVTLQLHGNQTVQPSFLSFTCRLQLEPVV  
P6\_UL148 WDSMHCTPFWSTDLEQMTDSVRRYSTVSPGKEVTLQLHGNQTVQPSFLSFTCRLQLEPVV  
P14\_UL148 WDSMHCTPFWSTDLEQMTDSVRRYSTVSPGKEVTLQLHGNQTVQPSFLSFTCRLQLEPVV  
P15\_UL148 WDSMHCTPFWSTDLEQMTDSVRRYSTVSPGKEVTLQLHGNQTVQPSFLSFTCRLQLEPVV  
P10\_UL148 WDSMHCTPFWSTDLEQMTDSVRRYSTVSPGKEVTLQLHGNQTVQPSFLSFTCRLQLEPVV

P4\_UL148 ENVGLYVAYVNDGERPQQFFTPQVDVRFALYLETLSRIVEPLESGRLAVEFDTPLDAL  
P6\_UL148 ENVGLYVAYVNDGERPQQFFTPQVDVRFALYLETLSRIVEPLESGRLAVEFDTPLDAL  
P14\_UL148 ENVGLYVAYVNDGERPQQFFTPQVDVRFALYLETLSRIVEPLESGRLAVEFDTPLDAL  
P15\_UL148 ENVGLYVAYVNDGERPQQFFTPQVDVRFALYLETLSRIVEPLESGRLAVEFDTPLDAL  
P10\_UL148 ENVGLYVAYVNDGERPQQFFTPQVDVRFALYLETLSRIVEPLESGRLAVEFDTPLDAL

P4\_UL148 APDLVSSLFVAGHGETDFYMNWTLRRSQTHYLEEMALQVEILKPRGVRHRAIIHHPKLQP  
P6\_UL148 APDLVSSLFVAGHGETDFYMNWTLRRSQTHYLEEMALQVEILKPRGVRHRAIIHHPKLQP  
P14\_UL148 APDLVSSLFVAGHGETDFYMNWTLRRSQTHYLEEMALQVEILKPRGVRHRAIIHHPKLQP  
P15\_UL148 APDLVSSLFVAGHGETDFYMNWTLRRSQTHYLEEMALQVEILKPRGVRHRAIIHHPKLQP  
P10\_UL148 APDLVSSLFVAGHGETDFYMNWTLRRSQTHYLEEMALQVEILKPRGVRHRAIIHHPKLQP

P4\_UL148 GVGLWIDFCVYRYNARLTRGYVRYTLSPKARLPAKAEGWLVS�DRFIVQYLNTLLITMMA  
P6\_UL148 GVGLWIDFCVYRYNARLTRGYVRYTLSPKARLPAKAEGWLVS�DRFIVQYLNTLLITMMA  
P14\_UL148 GVGLWIDFCVYRYNARLTRGYVRYTLSPKARLPAKAEGWLVS�DRFIVQYLNTLLITMMA  
P15\_UL148 GVGLWIDFCVYRYNARLTRGYVRYTLSPKARLPAKAEGWLVS�DRFIVQYLNTLLITMMA  
P10\_UL148 GVGLWIDFCVYRYNARLTRGYVRYTLSPKARLPAKAEGWLVS�DRFIVQYLNTLLITMMA

P4\_UL148 AIWARVLITYLVSRRR  
P6\_UL148 AIWARVLITYLVSRRR  
P14\_UL148 AIWARVLITYLVSRRR  
P15\_UL148 AIWARVLITYLVSRRR  
P10\_UL148 AIWARVLITYLVSRRR

**UL148A**

P4\_UL148A MSSDSNFDWPVPCVVVMTSVVLFAGLHVYLVYVRRQLVAFCLKVCVRCCKDETTPL  
P6\_UL148A MSSDSNFDWPVPCVVVMTSVVLFAGLHVYLVYVRRQLVAFCLKVCVRCCKDETTPL  
P14\_UL148A MSSDSNFDWPVPCVVVMTSVVLFAGLHVYLVYVRRQLVAFCLKVCVRCCKDETTPL  
P15\_UL148A MSSDSNFDWPVPCVVVMTSVVLFAGLHVYLVYVRRQLVAFCLKVCVRCCKDETTPL  
P10\_UL148A MSSSDNLDWPVPCVVVMTSVVLFAGLHVYLVYVRRQLVAFCLKVCVRCCKDETTPL

P4\_UL148a VEDAEPPELEMVEVSDECY  
P6\_UL148A VEDAEPPELEMVEVSDECY  
P14\_UL148A VEDAEPPELEMVEVSDECY  
P15\_UL148A VEDAEPPELEMVEVSDECY  
P10\_UL148A VEDAEPPELEMVEVSDECY

**US9**

P4\_US9 MILWSPSTCSFFWHWCLIAVSVLSSRSKESLRLSWSSDESSASSSSRICPLSNSKSVRLP  
P6\_US9 MILWSPSTCSFFWHWCLIAVSVLSSRSKESLRLSWSSDESSASSSSRICPLSNSKSVRLP  
P10\_US9 MILWSPSTCSFFWHWCLIAVSVLSSRSKESLRLSWSSDESSASSSSRICPLSNSKSVRLP  
P14\_US9 MILWSPSTCSFFWHWCLIAVSVLSSRSKESLRLSWSSDESSASSSSRICPLSNSKSVRLP  
P15\_US9 MILWSPSTCSFFWHWCLIAVSVLSSRSKESLRLSWSSDESSASSSSRICPLSNSKSVRLP

P4\_US9 QYPRGFGDVSGYRVSSSVSECYVQHGVLVAAWLVVGRNFSDTAPRAYGTWGNERSATHFKV  
P6\_US9 QYPRGFGDVSGYRVSSSVSECYVQHGVLVAAWLVVGRNFSDTAPRAYGTWGNERSATHFKV  
P10\_US9 QYPRGFGDVSGYRVSSSVSECYVQHGVLVAAWLVVGRNFSDTAPRAYGTWGNERSATHFKV  
P14\_US9 QYPRGFGDVSGYRVSSSVSECYVQHGVLVAAWLVVGRNFSDTAPRAYGTWGNERSATHFKV  
P15\_US9 QYPRGFGDVSGYRVSSSVSECYVQHGVLVAAWLVVGRNFSDTAPRAYGTWGNERSATHFKV

P4\_US9 GAPQLENDGALRYETELPQVDARLSYVMLTVYPCACNRSVLHCRPASRLPWLPLRVTPS  
P6\_US9 GAPQLENDGALRYETELPQVDARLSYVMLTVYPCACNRSVLHCRPASRLPWLPLRVTPS  
P10\_US9 GAPQLENDGALRYETELPQVDARLSYVMLTVYPCACNRSVLHCRPASRLPWLPLRVTPS  
P14\_US9 GAPQLENDGALRYETELPQVDARLSYVMLTVYPCACNRSVLHCRPASRLPWLPLRVTPS  
P15\_US9 GAPQLENDGALRYETELPQVDARLSYVMLTVYPCACNRSVLHCRPASRLPWLPLRVTPS

P4\_US9 DLERLFAERRYLTFLYVVLVQFVKHVALFSFGVQVACCVYLRWIRPWVGRHRATGRTSR  
P6\_US9 DLERLFAERRYLTFLYVVLVQFVKHVALFSFGVQVACCVYLRWIRPWVGRHRATGRTSR  
P10\_US9 DLERLFAERRYLTFLYVVLVQFVKHVALFSFGVQVACCVYLRWIRPWVGRHRATGRTSR  
P14\_US9 DLERLFAERRYLTFLYVVLVQFVKHVALFSFGVQVACCVYLRWIRPWVGRHRATGRTSR  
P15\_US9 DLERLFAERRYLTFLYVVLVQFVKHVALFSFGVQVACCVYLRWIRPWVGRHRATGRTSR

P4\_US9 EEEAKDD  
P6\_US9 EEEAKDD  
P10\_US9 EEEAKDD  
P14\_US9 EEEAKDD  
P15\_US9 EEEAKDD

**US12**

P4\_US12 MVQIQFHQGEPLGHKKEKPPVSPSPPPIRRVTITKDEDTLRSVQHFLMVMVRLYGTVV  
P6\_US12 MVQIQFHQGEPLGHKKEKPPVSPSPPPIRRVTITKDEDTLRSVQHFLMVMVRLYGTVV  
P10\_US12 MVQIQFHQGEPLGHKKEKPPVSPSPPPIRRVTITKDEDTLRSVQHFLMVMVRLYGTVV  
P15\_US12 MVQIQFHQGEPLGHKKEKPPVSPSPPPIRRVTITKDEDTLRSVQHFLMVMVRLYGTVV  
P14\_US12 MVQIQFHQGEPLGHKKEKPPVSPSPPPIRRVTITKDEDTLRSVQHFLMVMVRLYGTVV

P4\_US12 FQTSATIATTILFMLIPWRVTPYLRDTPFWSTLLPCALRCHAYWLERRRRPGTLMMLVM  
P6\_US12 FQTSATIATTILFMLIPWRVTPYLRDTPFWSTLLPCALRCHAYWLERRRRPGTLMMLVM  
P10\_US12 FQTSATIATTILFMLIPWRVTPYLRDTPFWSTLLPCALRCHAYWLERRRRPGTLMMLVM  
P15\_US12 FQTSATIATTILFMLIPWRVTPYLRDTPFWSTLLPCALRCHAYWLERRRRPGTLMMLVM  
P14\_US12 FQTSATIATTILFMLIPWRVTPYLRDTPFWSTLLPCALRCHAYWLERRRRPGTLMMLVM

P4\_US12 VYTTLTTSISVSTIGLCFDRTVVIQAYVLSMMLCVWCTGLAWLMAWNMQRRRLAILCLLSFM  
P6\_US12 VYTTLTTSISVSTIGLCFDRTVVIQAYVLSMMLCVWCTGLAWLMAWNMQRRRLAILCLLSFM  
P10\_US12 VYTTLTTSISVSTIGLCFDRTVVIQAYVLSMMLCVWCTGLAWLMAWNMQRRRLAILCLLSFM  
P15\_US12 VYTTLTTSISVSTIGLCFDRTVVIQAYVLSMMLCVWCTGLAWLMAWNMQRRRLAILCLLSFM  
P14\_US12 VYTTLTTSISVSTIGLCFDRTVVIQAYVLSMMLCVWCTGLAWLMAWNMQRRRLAILCLLSFM

P4\_US12 LPILWLFIAVQSWEPYQRIILALTVSFIYGLKIVLIRDTLTVLYRSPSNCTDGDLLRTA  
P6\_US12 LPILWLFIAVQSWEPYQRIILALTVSFIYGLKIVLIRDTLTVLYRSPSNCTDGDLLRTA  
P10\_US12 LPILWLFIAVQSWEPYQRIILALTVSFIYGLKIVLIRDTLTVLYRSPSNCTDGDLLRTA  
P15\_US12 LPILWLFIAVQSWEPYQRIILALTVSFIYGLKIVLIRDTLTVLYRSPSNCTDGDLLRTA

P14\_US12 LPIILWLFIAVQSWEPYQRILALTVSFIYGLKIVLIRDITLTVLYRSPSNCYTDGDLRRTA  
P4\_US12 MLLYMDQVIMFLLVVVPLTAPIWYPNYAGALGRTAHWLFHK  
P6\_US12 MLLYMDQVIMFLLVVVPLTAPIWYPNYAGALGRTAHWLFHK  
P10\_US12 MLLYMDQVIMFLLVVVPLTAPIWYPNYAGALGRTAHWLFHK  
P15\_US12 MLLYMDQVIMFLLVVVPLTAPIWYPNYAGALGRTAHWLFHK  
P14\_US12 MLLYMDQVIMFLLVVVPLTAPIWYPNYAGALGRTAHWLFHK

**US14**

P14\_US14 METVSTQRETASSETERTREAASAETTDATFRSLEEGSTISSRYSETASTVSEDAVCWLR  
P15\_US14 METVSTQRETASSETERTREAASAETTDATFRSLEEGSTISSRYSETASTVSEDAVCWLR  
P10\_US14 M~~K~~TVSTQRETASSETERTREAASAETTDATFRSLEEGSTISSRYSETASTVSE~~N~~AVCWLR  
P6\_US14 METVSTQRETASSETERTREAASAETTDATFRSLEEGSTISSRYSETASTVSEDAVCWLR  
P4\_US14 METVSTQRETASSETERTREAASAETTDATFRSLEEGSTISSRYSETASTVSEDAVCWLR

P14\_US14 RTAIVMRVYGLLTLETAFSVLISALVWLGYPVSLGYECSDDPSPLLLCTPVLVVGALELT  
P15\_US14 RTAIVMRVYGLLTLETAFSVLISALVWLGYPVSLGYECSDDPSPLLLCTPVLVVGALELT  
P10\_US14 RTAIVMRVYGLLTLETAFSVLISALVWLGYPVSLGYECSDDPSPLLLCTPVLVVGALELT  
P6\_US14 RTAIVMRVYGLLTLETAFSVLISALVWLGYPVSLGYECSDDPSPLLLCTPVLVVGALELT  
P4\_US14 RTAIVMRVYGLLTLETAFSVLISALVWLGYPVSLGYECSDDPSPLLLCTPVLVVGALELT

P14\_US14 DHRHPSNGLVFALYVALLSFTTAGLNLCATAPIGISSILITWTLFVACNGVAWEHRLSSV  
P15\_US14 DHRHPSNGLVFALYVALLSFTTAGLNLCATAPIGISSILITWTLFVACNGVAWEHRLSSV  
P10\_US14 DHRHPSNGLVFALYVALLSFTTAGLNLCATAPIGISSILITWTLFVACNGVAWEHRLSSV  
P6\_US14 DHRHPSNGLVFALYVALLSFTTAGLNLCATAPIGISSILITWTLFVACNGVAWEHRLSSV  
P4\_US14 DHRHPSNGLVFALYVALLSFTTAGLNLCATAPIGISSILITWTLFVACNGVAWEHRLSSV

P14\_US14 WRDALFTSTLLTVMVSVLASTYTWLHKTLLCLYTVFVGCILAVLFQDVRVIATKMPVSHV  
P15\_US14 WRDALFTSTLLTVMVSVLASTYTWLHKTLLCLYTVFVGCILAVLFQDVRVIATKMPVSHV  
P10\_US14 WRDALFTSTLLTVMVSVLASTYTWLHKTLLCLYTVFVGCILAVLFQDVRVIATKMPV~~N~~HV  
P6\_US14 WRDALFTSTLLTVMVSVLASTYTWLHKTLLCLYTVFVGCILAVLFQDVRVIATKMPVSHV  
P4\_US14 WRDALFTSTLLTVMVSVLASTYTWLHKTLLCLYTVFVGCILAVLFQDVRVIATKMPVSHV

P14\_US14 IRSSLILYATETLIYHTLLMLTPVWVSARWDQMFSYLAKLGTYYHYLIDNGTLSVILNT  
P15\_US14 IRSSLILYATETLIYHTLLMLTPVWVSARWDQMFSYLAKLGTYYHYLIDNGTLSVILNT  
P10\_US14 IRSSLILYATETLIYHTLLMLTPVWVSARWDQMFSYLAKLGTYYHYLIDNGTLSVIL~~N~~S  
P6\_US14 IRSSLILYATETLIYHTLLMLTPVWVSARWDQMFSYLAKLGTYYHYLIDNGTLSVILNT  
P4\_US14 IRSSLILYATETLIYHTLLMLTPVWVSARWDQMFSYLAKLGTYYHYLIDNGTLSVILNT

P14\_US14 TTATFQSKAA  
P15\_US14 TTATFQSKAA  
P10\_US14 TTATFQ~~S~~VA  
P6\_US14 TTATFQSKAA  
P4\_US14 TTATFQSKAA

**US18**

P4\_US18 MGD~~T~~ASVSEHHESPTVTIVPLHRSHALVAEQQLFQWLKRFKLLMEVYHGLVWQLACTLTV  
P6\_US18 MGD~~T~~ASVSEHHESPTVTIVPLHRSHALVAEQQLFQWLKRFKLLMEVYHGLVWQLACTLTV  
P10\_US18 MGD~~T~~ASVSEHHESPTVTIVPLHRSHALVAEQQLFQWLKRFKLLMEVYHGLVWQLACTLTV  
P14\_US18 MGD~~T~~ASVSEHHESPTVTIVPLHRSHALVAEQQLFQWLKRFKLLMEVYHGLVWQLACTLTV  
P15\_US18 MGD~~T~~ASVSEHHESPTVTIVPLHRSHALVAEQQLFQWLKRFKLLMEVYHGLVWQLACTLTV

P4\_US18 CLLAWLAFPDVQGCANGI~~V~~PALSSIVPVSTLAML~~R~~GF~~A~~FRPHTTNFAHLTVACLLINT  
P6\_US18 CLLAWLAFPDVQGCANGI~~V~~PALSSIVPVSTLAML~~R~~GF~~A~~FRPHTTNFAHLTVACLLINT  
P10\_US18 CLLAWLAFPDVQGCANGI~~V~~PALSSIVPVSTLAML~~R~~GF~~A~~FRPHTTNFAHLTVACLLINT  
P14\_US18 CLLAWLAFPDVQGCANGI~~V~~PALSSIVPVSTLAML~~R~~GF~~A~~FRPHTTNFAHLTVACLLINT  
P15\_US18 CLLAWLAFPDVQGCANGI~~V~~PALSSIVPVSTLAML~~R~~GF~~A~~FRPHTTNFAHLTVACLLINT

P4\_US18 GITVCTGFCGERRVIGLSFALVMVFFVLCGLTYLAGNNPTRWKVIGIGYGSVIVFYLL  
P6\_US18 GITVCTGFCGERRVIGLSFALVMVFFVLCGLTYLAGNNPTRWKVIGIGYGSVIVFYLL  
P10\_US18 GITVCTGFCGERRVIGLSFALVMVFFVLCGLTYLAGNNPTRWKVIGIGYGSVIVFYLL  
P14\_US18 GITVCTGFCGERRVIGLSFALVMVFFVLCGLTYLAGNNPTRWKVIGIGYGSVIVFYLL  
P15\_US18 GITVCTGFCGERRVIGLSFALVMVFFVLCGLTYLAGNNPTRWKVIGIGYGSVIVFYLL

P4\_US18 LYFSPVLWVSKIYSGLYVLVVTAA~~S~~AVLIYETLDLIYQRGTL~~S~~KN~~S~~VCVSVVLYTIVMSL  
P6\_US18 LYFSPVLWVSKIYSGLYVLVVTAA~~S~~AVLIYETLDLIYQRGTL~~S~~KN~~S~~VCVSVVLYTIVMSL



P10\_US18 LYFSPVLWVSKIYSGLYVLVWTAASAVLIYETLDLIYQRGTLKNSVCVSVVLYTIVMSL  
P14\_US18 LYFSPVLWVSKIYSGLYVLVWTAASAVLIYETLDLIYQRGTLKNSVCVSVVLYTIVMSL  
P15\_US18 LYFSPVLWVSKIYSGLYVLVWTAASAVLIYETLDLIYQRGTLKNSVCVSVVLYTIVMSL

P4\_US18 LNMSVAIFSGHVWVQYAEKHGGRIDGVSLLSLL  
P6\_US18 LNMSVAIFSGHVWVQYAEKHGGRIDGVSLLSLL  
P10\_US18 LNMSVAIFSGHVWVQYAEKHGGRIDGVSLLSLL  
P14\_US18 LNMSVAIFSGHVWVQYAEKHGGRIDGVSLLSLL  
P15\_US18 LNMSVAIFSGHVWVQYAEKHGGRIDGVSLLSLL

**US20**

P4\_US20 MQAQEANALLSRMEALEWFKKFTVWLRVYAIFFQLAFSFGSGVFWLGFPPQNRNFCVE  
P6\_US20 MQAQEANALLSRMEALEWFKKFTVWLRVYAIFFQLAFSFGSGVFWLGFPPQNRNFCVE  
P10\_US20 MQAQEANALLSRMEALEWFKKFTVWLRVYAIFFQLAFSFGSGVFWLGFPPQNRNFCVE  
P14\_US20 MQAQEANALLSRMEALEWFKKFTVWLRVYAIFFQLAFSFGSGVFWLGFPPQNRNFCVE  
P15\_US20 MQAQEANALLSRMEALEWFKKFTVWLRVYAIFFQLAFSFGSGVFWLGFPPQNRNFCVE

P4\_US20 NYSFFLTVLVPIVCMFITYTLGNEHPSNATVLFYLLANSLTAAIFQMCSESRLVGSYV  
P6\_US20 NYSFFLTVLVPIVCMFITYTLGNEHPSNATVLFYLLANSLTAAIFQMCSESRLVGSYV  
P10\_US20 NYSFFLTVLVPIVCMFITYTLGNEHPSNATVLFYLLANSLTAAIFQMCSESRLVGSYV  
P14\_US20 NYSFFLTVLVPIVCMFITYTLGNEHPSNATVLFYLLANSLTAAIFQMCSESRLVGSYV  
P15\_US20 NYSFFLTVLVPIVCMFITYTLGNEHPSNATVLFYLLANSLTAAIFQMCSESRLVGSYV

P4\_US20 MTLALFISFTGLAFLGGRDRRWRKICISCVVVMLLSFLTLALLSDADWLQKIVVTLCAFS  
P6\_US20 MTLALFISFTGLAFLGGRDRRWRKICISCVVVMLLSFLTLALLSDADWLQKIVVTLCAFS  
P10\_US20 MTLALFISFTGLAFLGGRDRRWRKICISCVVVMLLSFLTLALLSDADWLQKIVVTLCAFS  
P14\_US20 MTLALFISFTGLAFLGGRDRRWRKICISCVVVMLLSFLTLALLSDADWLQKIVVTLCAFS  
P15\_US20 MTLALFISFTGLAFLGGRDRRWRKICISCVVVMLLSFLTLALLSDADWLQKIVVTLCAFS

P4\_US20 ISFFLGILAYDSLMIFFCPPNQICIRHAVCLYLDSMAIFLTLMLSGPRWISLSDGAPL  
P6\_US20 ISFFLGILAYDSLMIFFCPPNQICIRHAVCLYLDSMAIFLTLMLSGPRWISLSDGAPL  
P10\_US20 ISFFLGILAYDSLMIFFCPPNQICIRHAVCLYLDSMAIFLTLMLSGPRWISLSDGAPL  
P14\_US20 ISFFLGILAYDSLMIFFCPPNQICIRHAVCLYLDSMAIFLTLMLSGPRWISLSDGAPL  
P15\_US20 ISFFLGILAYDSLMIFFCPPNQICIRHAVCLYLDSMAIFLTLMLSGPRWISLSDGAPL

P4\_US20 DNGTLTAASTTGKS  
P6\_US20 DNGTLTAASTTGKS  
P10\_US20 DNGTLTAASTTGKS  
P14\_US20 DNGTLTAASTTGKS  
P15\_US20 DNGTLTAASTTGKS
