# Supplementary material for: Genetic Variability of Human Cytomegalovirus Clinical Isolates Correlates With Altered Expression of Natural Killer Cell-Activating Ligands and IFN-γ
Source: PubMed Central journal article supplement (PMC8062705; doi:10.3389/fimmu.2021.532484), 2021-04-09
Supplement: Table_1.pdf [file Table_1.pdf]

**Supplementary Table 1: Summary of sequencing data**

| <b>Patient</b>               | <b>P4</b> | <b>P6</b> | <b>P10</b> | <b>P14</b> | <b>P15</b> |
|------------------------------|-----------|-----------|------------|------------|------------|
| Total trimmed reads (no.)    | 462,212   | 7,083,940 | 1,207,286  | 540,480    | 386,112    |
| Duplicates (%)               | 0.17      | 0.25      | 0.41       | 0.42       | 0.32       |
| HCMV reads (no.)             | 365,711   | 261,202   | 1,141,561  | 460,559    | 287,305    |
| HCMV reads (%)               | 79.12     | 3.69      | 94.56      | 85.21      | 74.41      |
| Mean read length             | 284       | 196       | 289        | 288        | 283        |
| Average coverage depth + std | 453±128   | 224±73    | 1355±825   | 577±176    | 355±124    |
